# Supplementary material for: MIST (Modified Intubating Sequence for Transmissibility) Bundle for Infectious Diseases with Aerosol Hazard
Source: PubMed Central journal article supplement (PMC7514411; doi:10.5811/westjem.2020.7.47473), 2020-08-17
Supplement: wjem-21-1076-s001.pdf [file wjem-21-1076-s001.pdf]

# MIST BUNDLE CHECKLIST

## COLD ZONE

- Determine the risk-benefit ratio of intubation
- Allocation of roles to the team members
- Use of closed-loop communication

### Role of Registered Respiratory Therapist (RRT)

- Pre-set the ventilator for pre-oxygenation
- Ensure sturdy connection of ventilator tubing
- Equipment in intubation trolley
  - Intubation unit
  - Macintosh Laryngoscope with blade size 3 and 4 in a sterile tray
  - Video laryngoscope preferred (if available)
  - Stethoscope
  - Cuffed ET tube
  - ET Tube fixator
  - IV fluid with infusion set
  - Zip lock bags

### Role of Registered Nurse (RN)

- Preload drugs with labelled syringes
- Drugs
  - Inj. Etomidate (0.3mg/kg body wt) or Inj. Ketamine (1-2 mg/kg body wt)
  - Inj. Rocuronium (1-1.2mg/kg body wt)
  - Vasopressor (if required)
  - Infusions for sedation and paralysis

### PPE

- Donning according to standard principles

## HOT ZONE

### Role of Team Leader (TL)

- Proper mask seal with NIV + Optimize patient position
- Adequate pre-oxygenation for 3mins until saturation is >88%
- Remove NIV mask only after the ventilator is on standby mode
- Ensure visual passage of bougie through the vocal cords
- Secure tube with tube fixator
- Place the laryngoscope with tray into a zip lock bag

### Role of Registered Respiratory Therapist (RRT)

- Ensure functioning of wall mounted suction
- Start ventilator for pre-oxygenation AFTER adequate mask seal
- Keep ventilator on standby mode after the pre-oxygenation
- Place the NIV mask in a zip lock bag
- Preset the ventilator to ACMV for ventilation after intubation
- Assist the TL with the intubating unit while passing the bougie through the vocal cord
- Inflate the cuff immediately after tracheal intubation
- Remove the bougie and discard into pre-set disposition system
- Confirm tube position by ETCO<sub>2</sub> monitor or five point auscultation
- Start mechanical ventilation only after cuff inflation
- Ensure there is no leak

### Role of Registered Nurse (RN)

- Ensure the patency of IV access
- Communicate the vitals periodically to the TL
- Administer the inducing and paralytic agent
- Initiate sedation and paralytic infusions

## WARM ZONE

- Careful equipment disposal
- Decontamination of reusable equipment
- Remove PPE
  - Standard doffing procedure
  - Meticulous disposal
